# Supplementary material for: Cationic micelles as nanocarriers for enhancing intra-cartilage drug penetration and retention
Source: Royal Society of Chemistry journal article supplement (doi:10.1039/d2tb02050e), 2022-12-14
Supplement: d2tb02050e1.pdf [file d2tb02050e1.pdf]

## Supplementary Information

### **Cationic micelles as nanocarriers for enhancing intra-cartilage drug penetration and retention**

Chenxian Zhu,<sup>a</sup> Zhongxing Zhang,<sup>\*a</sup> Yuting Wen,<sup>a,b</sup> Xia Song,<sup>a</sup> Jingling Zhu,<sup>a,c</sup> Yifei Yao,<sup>\*d</sup> and Jun Li<sup>\*a,b,c</sup>

<sup>a</sup> Department of Biomedical Engineering, National University of Singapore, 15 Kent Ridge Crescent, Singapore 119276, Singapore

<sup>b</sup> National University of Singapore (Chongqing) Research Institute, 2 Huizhu Road, Yubei District, Chongqing 401120, China

<sup>c</sup> NUS Environmental Research Institute (NERI), National University of Singapore, 5A Engineering Drive 1, Singapore 117411, Singapore

<sup>d</sup> School of Biomedical Engineering, Shanghai Jiao Tong University, Shanghai 200030, China

#### **\*Corresponding authors**

Emails: [biezhzh@nus.edu.sg](mailto:biezhzh@nus.edu.sg) (ZZ), [yifeiyao@sjtu.edu.cn](mailto:yifeiyao@sjtu.edu.cn) (YY), [jun-li@nus.edu.sg](mailto:jun-li@nus.edu.sg) (JL).

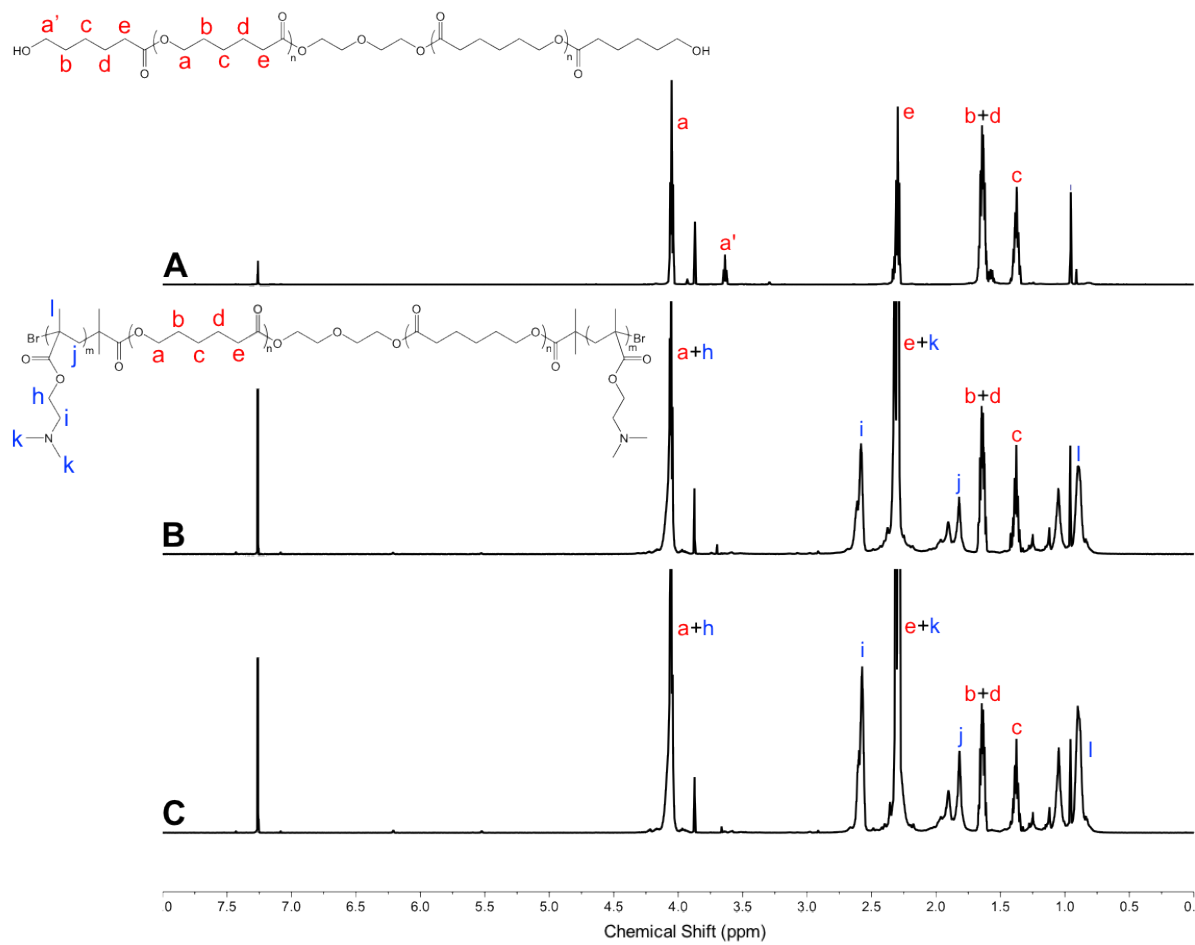

**Figure S1.**  $^1\text{H}$  NMR spectra of polymers in  $\text{CDCl}_3$ . (A) PCL-diol; (B)  $\text{D}_{16}\text{CL}_{17}\text{D}_{16}$ ; (C)  $\text{D}_{24}\text{CL}_{17}\text{D}_{24}$ .

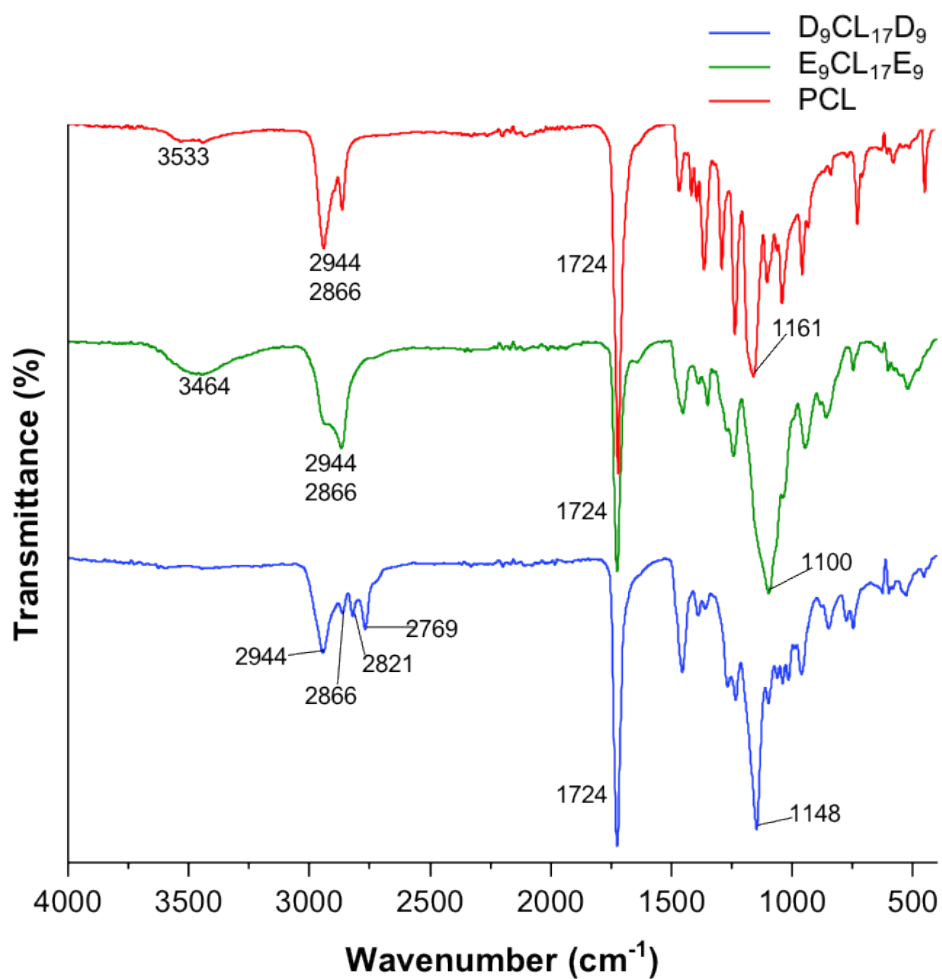

**Figure S2.** FTIR spectra of PCL-diol,  $E_9CL_{17}E_9$ , and  $D_9CL_{17}D_9$ .

**Table S1.** Zeta potential of  $D_9CL_{17}D_9$  and  $E_9CL_{17}E_9$  micelles at different pH values. Micelles were prepared by the nanoprecipitation method in  $0.1 \times$  PBS at a concentration of 1 mg/mL.

| Copolymer       | Zeta potential (mV) |        |        |
|-----------------|---------------------|--------|--------|
|                 | pH = 5              | pH = 7 | pH = 9 |
| $D_9CL_{17}D_9$ | 20.3                | 17.6   | 14.1   |
| $E_9CL_{17}E_9$ | -0.4                | -0.6   | -1.4   |

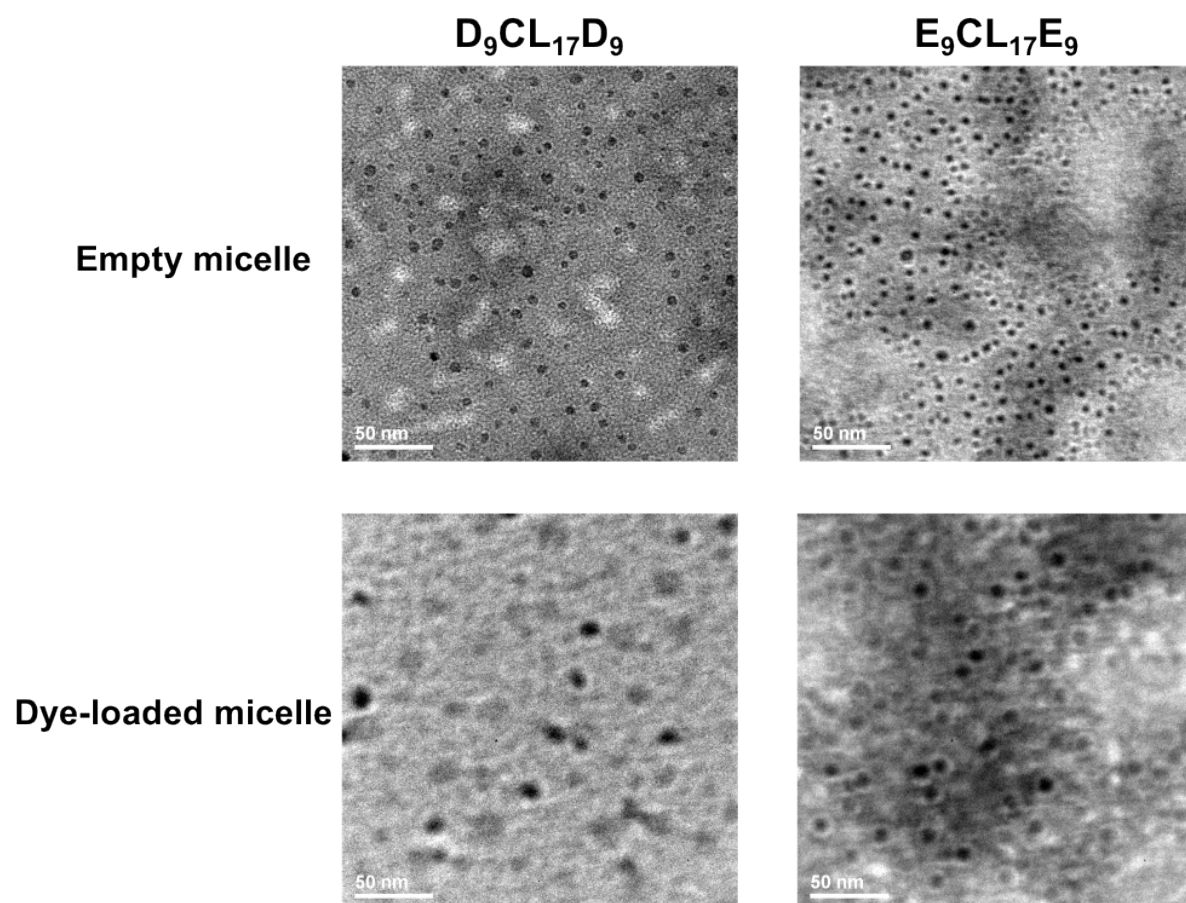

**Figure S3.** TEM images of empty and dye-loaded  $D_9CL_{17}D_9$  and  $E_9CL_{17}E_9$  micelles. Scale bar = 50 nm.

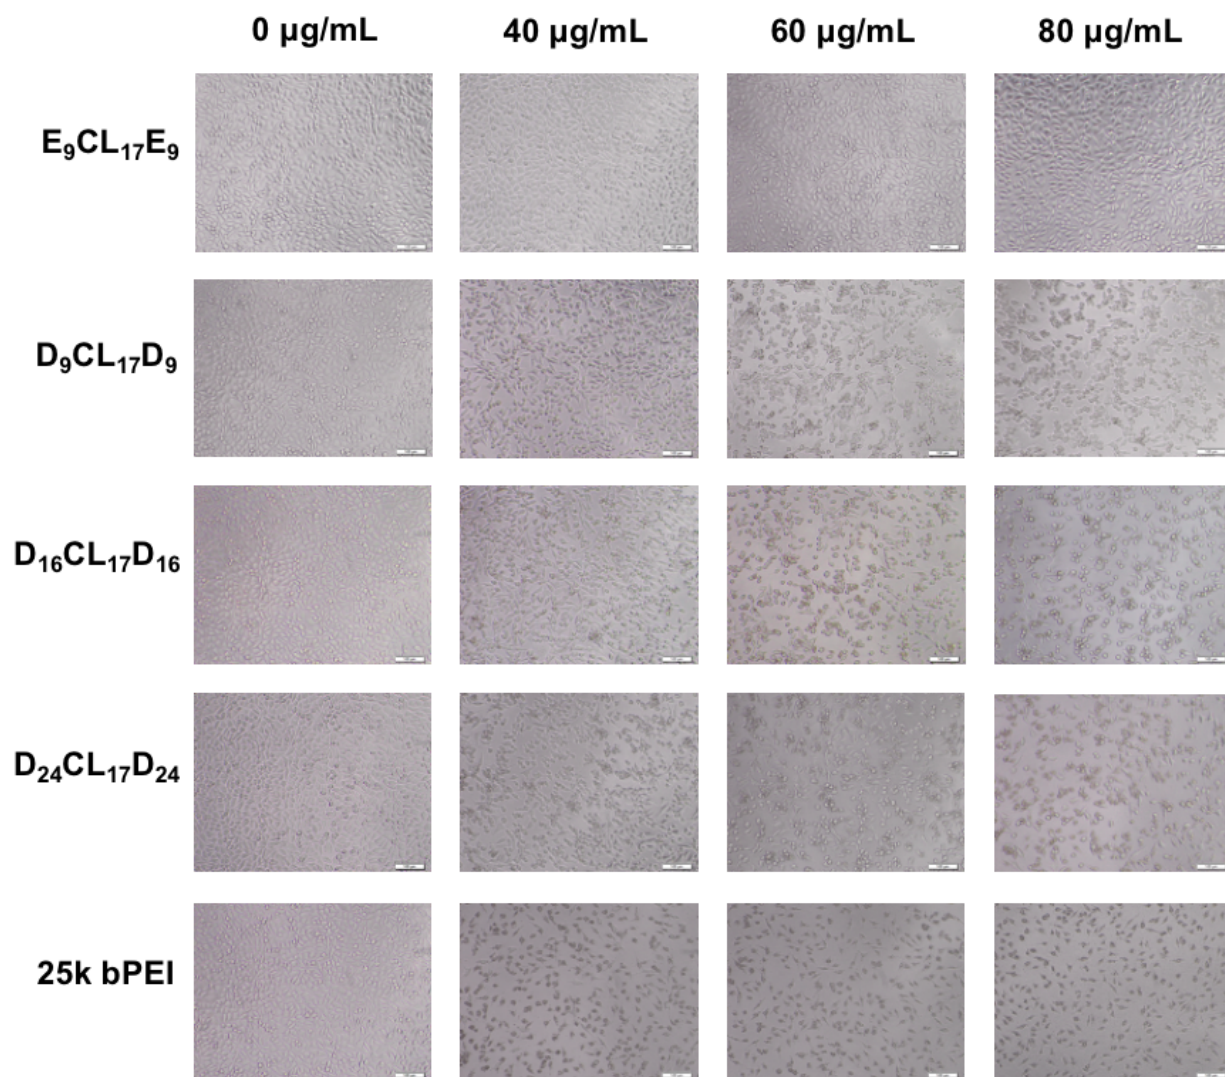

**Figure S4.** Cell morphology after treated with different micelles and bPEI was observed by microscopy at bright field at  $10 \times$  magnification. Scale bar =  $100 \mu\text{m}$ .

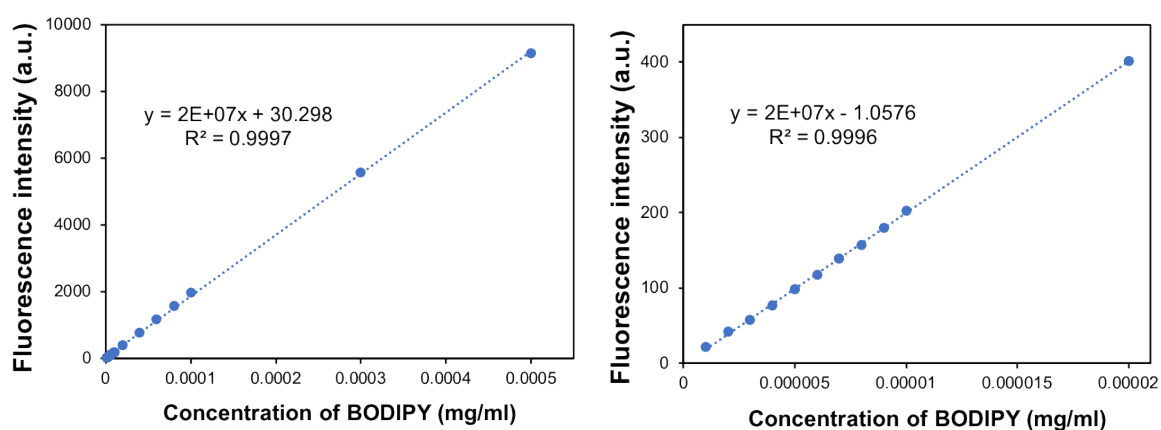

**Figure S5.** The standard curve of BODIPY with two concentration ranges in a mixture of 20% v/v DI water and 80% v/v acetone.

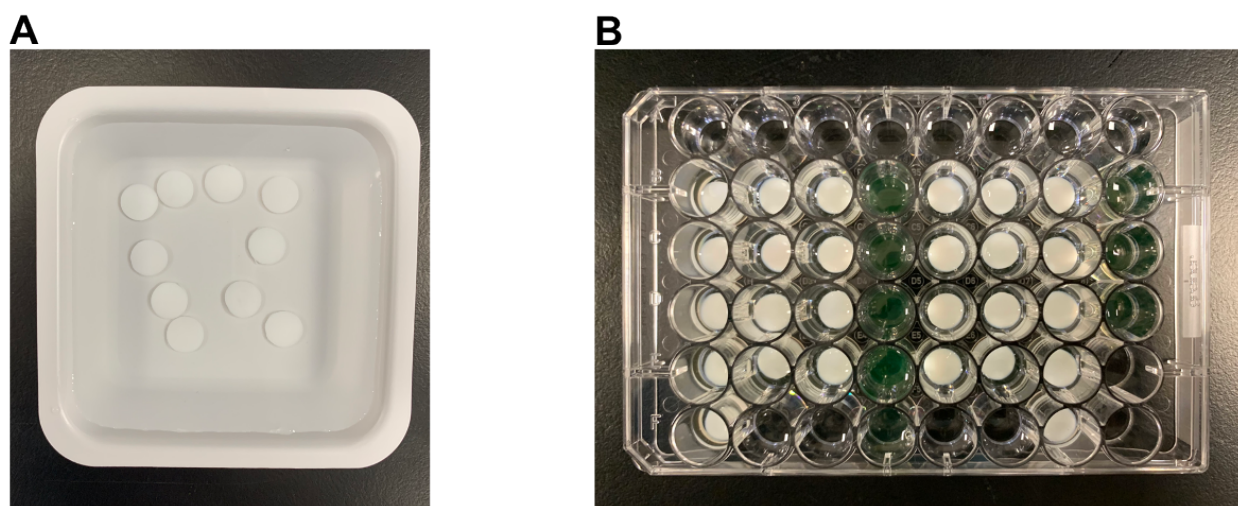

**Figure S6.** Photos of excised porcine cartilage disks. (A) After harvesting, the disks ( $\varnothing 9 \times 1.5$  mm) were washed and equilibrated with a sterile PBS solution. (B) For the absorption or desorption experiments, cartilage disks were equilibrated in 300  $\mu$ L of absorption or desorption baths in the 48-well plate.
